# Supplementary material for: The potential risk of enzootic Trypanosoma cruzi transmission inside four training and re-training military battalions (BITER) in Colombia
Source: PubMed Central journal article supplement (PMC8501693; doi:10.1186/s13071-021-05018-4), 2021-10-09
Supplement: 13071_2021_5018_MOESM2_ESM.pdf [file 13071_2021_5018_MOESM2_ESM.pdf]

## Genotyping of *T. cruzi* in positive samples

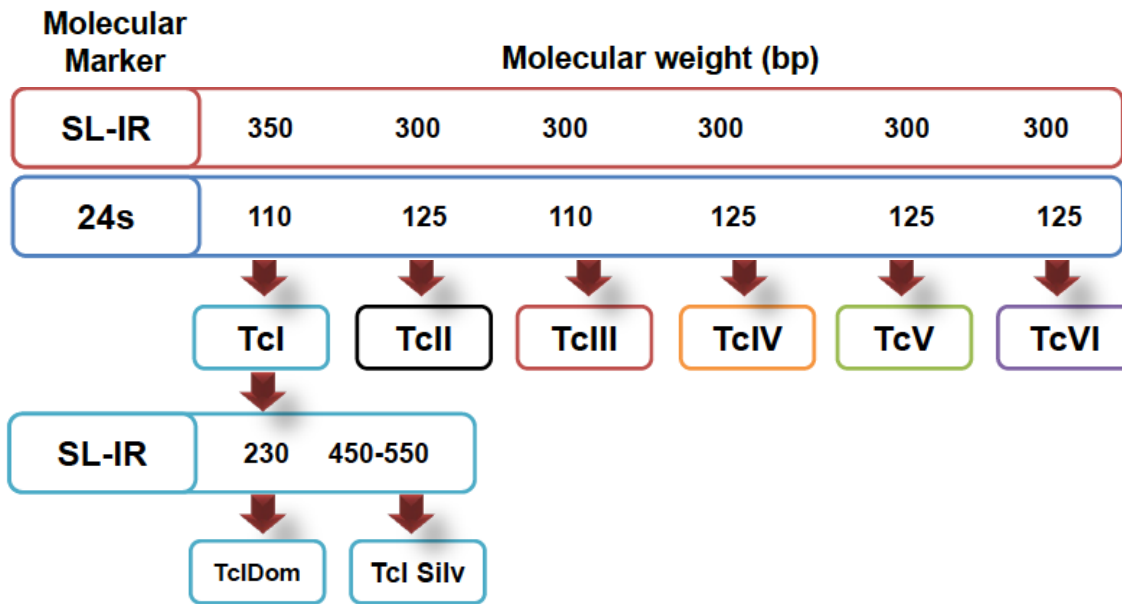

Adapted of Hernandez et al 2016
